# Supplementary material for: Regulation of solid–electrolyte interphase formation via a Li 3 PO 4 artificial layer for ultra-stable germanium anodes
Source: Royal Society of Chemistry journal article supplement (doi:10.1039/d4qi03038a), 2025-01-01
Supplement: d4qi03038a1.pdf [file d4qi03038a1.pdf]

*Supporting information for*

**Regulation of solid-electrolyte interphases formation via  $\text{Li}_3\text{PO}_4$  artificial layer for ultra-stable germanium anodes**

Haifeng Yan, Kun Chao, Zhonghua Zhang\*, Zhenfang Zhou, Yuanming Li, Xuguang Liu, Jing Liu, Xiaosong Guo, Changming Mao\* and Guicun Li\*

H.-F. Yan, C. Chao, Z.-H. Zhang, Z.-F. Zhou, Y.-M. Li, X.-G. Liu, J. Liu, X.-S. Guo, M.-C. Ming\*, G.-C. Li\*

College of Materials Science and Engineering, Qingdao University of Science and Technology, Qingdao 266042, Shandong, China

e-mail: guicunli@qust.edu.cn

M.-C. Ming\*

e-mail: mcm@qust.edu.cn

|                                                                                                                            | E <sub>total</sub> (Ha) | E <sub>1</sub> (Ha) | E <sub>2</sub> (Ha) | ΔE (eV) |
|----------------------------------------------------------------------------------------------------------------------------|-------------------------|---------------------|---------------------|---------|
| 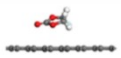<br>C, FEC                                | -2726.57140             | -2285.17098         | -441.38193          | -0.50   |
| <br>Ge, FEC                               | -149970.75857           | -149529.35309       | -441.38183          | -0.64   |
| <br>C/P, FEC                              | -3635.73283             | -3194.32357         | -441.38183          | -0.75   |
| <br>Li <sub>3</sub> PO <sub>4</sub> , FEC | -7091.79770             | -6650.34230         | -441.38055          | -2.04   |

Figure S1 Calculated data on the binding energy of FEC molecules adsorbed on the surface of different materials, respectively.

|                                                                                                                             | E <sub>total</sub> (Ha) | E <sub>1</sub> (Ha) | E <sub>2</sub> (Ha) | ΔE (eV) |
|-----------------------------------------------------------------------------------------------------------------------------|-------------------------|---------------------|---------------------|---------|
| 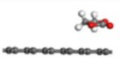<br>C, EC                                  | -2627.34541             | -2285.17098         | -342.17429          | -0.39   |
| <br>Ge, EC                                 | -149871.54545           | -149529.35309       | -342.17429          | -0.49   |
| <br>C/P, EC                               | -3536.51372             | -3194.32357         | -342.17429          | -0.43   |
| <br>Li <sub>3</sub> PO <sub>4</sub> , EC | -6992.53023             | -6650.34230         | -342.17429          | -0.37   |

Figure S2 Calculated data on the binding energy of EC molecules adsorbed on the surface of different materials, respectively.

The calculated adsorption energies of EC on the surfaces of C (001), Ge (111), P/C, and Li<sub>3</sub>PO<sub>4</sub> (021) are -0.39 eV, -0.49 eV, -0.43 eV, and -0.37 eV, respectively.

|                                                                                                                              | E <sub>total</sub> (Ha) | E <sub>1</sub> (Ha) | E <sub>2</sub> (Ha) | ΔE (eV) |
|------------------------------------------------------------------------------------------------------------------------------|-------------------------|---------------------|---------------------|---------|
| 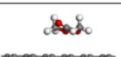<br>C, DMC                                | -2628.32624             | -2285.17098         | -343.13830          | -0.46   |
| <br>Ge, DMC                               | -149872.51020           | -149529.35309       | -343.13830          | -0.51   |
| <br>C/P, DMC                              | -3537.48252             | -3194.32357         | -343.13830          | -0.56   |
| <br>Li <sub>3</sub> PO <sub>4</sub> , DMC | -6993.49830             | -6650.34230         | -343.13830          | -0.48   |

Figure S3 Calculated data on the binding energy of DMC molecules adsorbed on the surface of different materials, respectively.

The calculated binding energies of DMC on the surfaces of C (001), Ge (111), P/C, and Li<sub>3</sub>PO<sub>4</sub> (021) are -0.46 eV, -0.51 eV, -0.56 eV, and -0.48 eV, respectively.

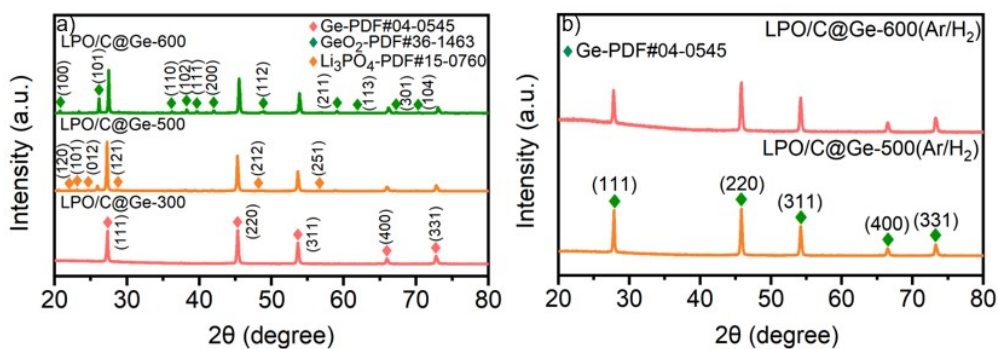

Figure S4 XRD patterns of the LPO/C@Ge in N<sub>2</sub> atmosphere (a) and Ar/H<sub>2</sub> atmosphere (b).

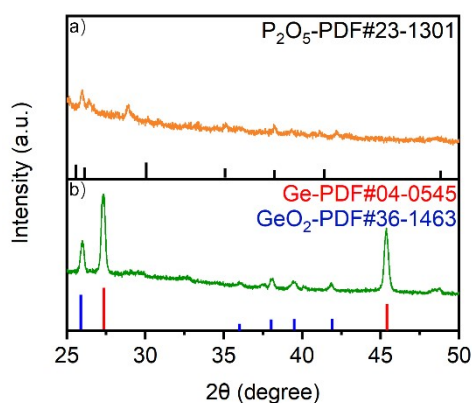

Figure S5 XRD patterns of the PA-400 (a) and 10P/C@Ge-400 (b).

The product of PA after annealing at 400°C is a composite of P<sub>2</sub>O<sub>5</sub> and amorphous products. During the synthesis, a higher amount of PA was used in the P/C@Ge-400 sample (the ratio of PA to Ge was 1:4), and the results indicated the presence of trace amounts of P<sub>2</sub>O<sub>5</sub> in the P/C@Ge-400 sample. These findings may suggest that PA is converted into phosphate oxides and a certain amount of P/C during the sample synthesis process.

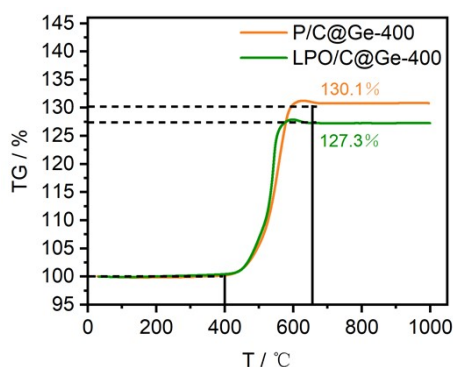

Figure S6 TG curve of LPO/C@Ge and P/C@Ge.

There is a weight increase during temperature increasing. In air condition, it is assumed that the P-doped carbon species in P/C@Ge sample are oxidized to be P<sub>2</sub>O<sub>5</sub> (boiling point is around 360 °C) and CO<sub>2</sub>, both of which are in gas states. Thus the oxidization of Ge to form GeO<sub>2</sub> contributes to the main weight increase during 400~650 °C. According to this assumption, the carbon content

is calculated to be 9.7%. As for LPO/C@Ge sample, it is hard to determine the actual content of carbon species because of the influence of  $\text{Li}_3\text{PO}_4$ . Thus, the carbon content is determined to be <11.6% based on above assumption.

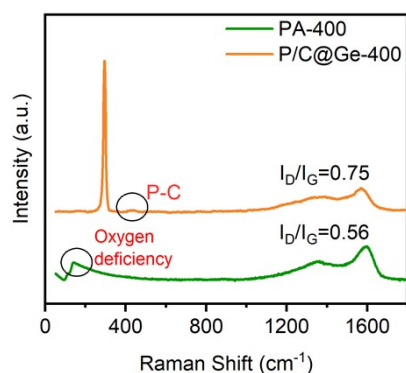

Figure S7 Raman spectra of PA-400 and P/C@Ge.

The peak at  $150\text{ cm}^{-1}$  in PA-400 corresponds to a large number of oxygen vacancies, which is attributed to  $\text{P}_2\text{O}_5$ . No distinct signal for P-doped carbon ( $350\text{--}450\text{ cm}^{-1}$ ) is observed. In contrast, the peak at  $420\text{ cm}^{-1}$  in P/C@Ge-400 is assigned to P-doped carbon. The analysis of the D and G bands indicates that PA-400 has a higher degree of graphitization, while the higher defect density in P/C@Ge-400 is attributed to P doping, indirectly corroborating the aforementioned conclusion.

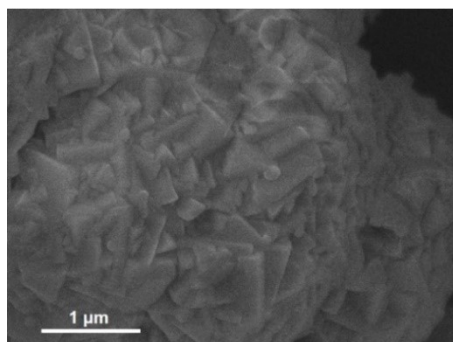

Figure S8 SEM image of  $\text{GeO}_2$  pristine.

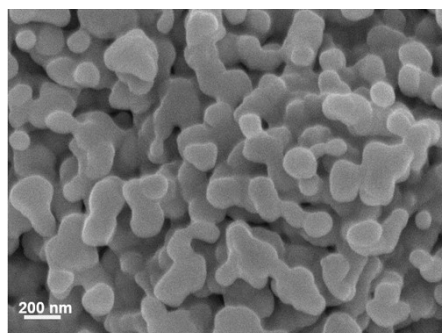

Figure S9 SEM image of bare Ge particle.

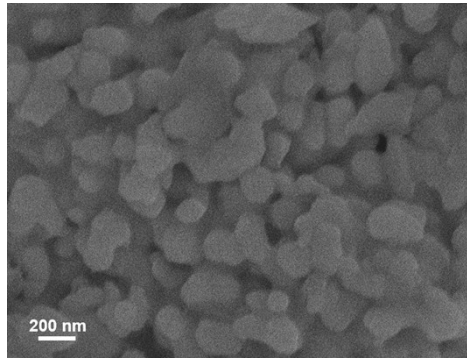

Figure S10 SEM image of LPO/C@Ge particle.

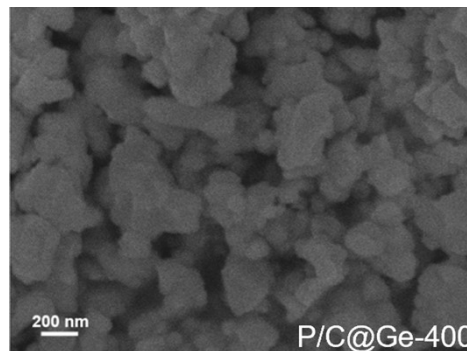

Figure S11 The SEM images of P/C@Ge-400.

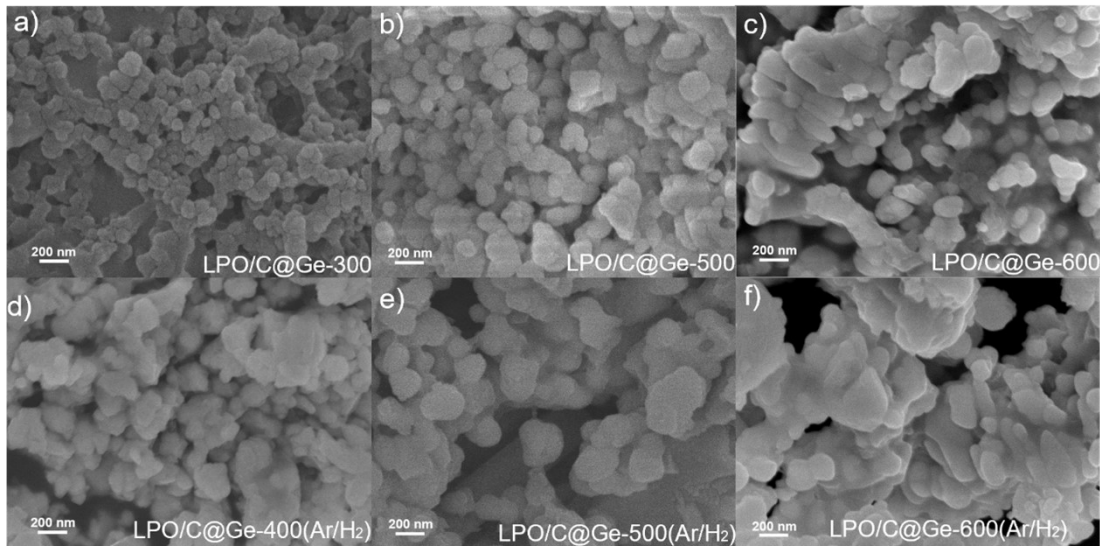

Figure S12 The SEM images of LPO/C@Ge thermally annealed at different temperatures and atmospheres. (a) 300 °C (N<sub>2</sub>), (b) 500 °C (N<sub>2</sub>), (c) 600 °C (N<sub>2</sub>), (d) 400°C (Ar/H<sub>2</sub>), (e) 500 °C (Ar/H<sub>2</sub>), (f) 600 °C (Ar/H<sub>2</sub>).

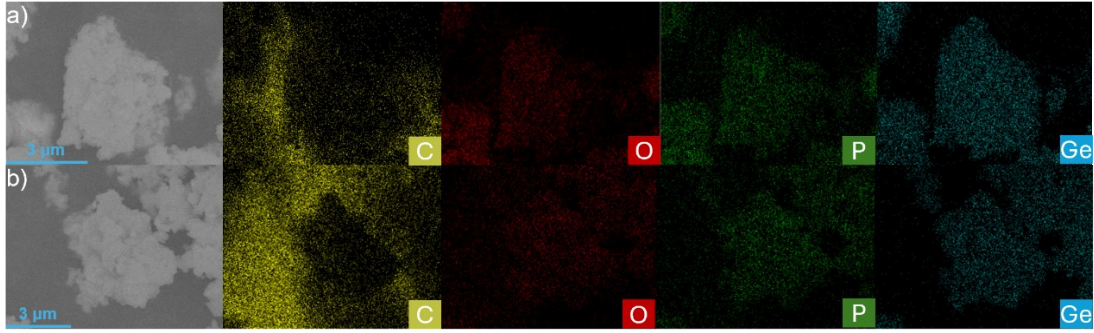

Figure S13 EDS-mapping images of LPO/C@Ge (a) and P/C@Ge (b).

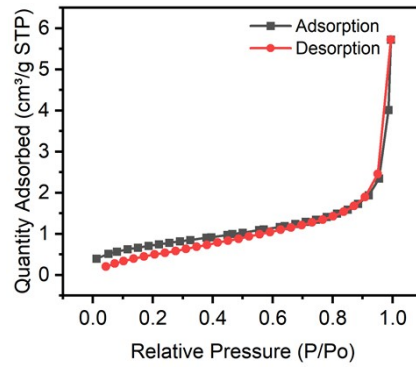

Figure S14 The N<sub>2</sub> adsorption and desorption curves of P/C@Ge.

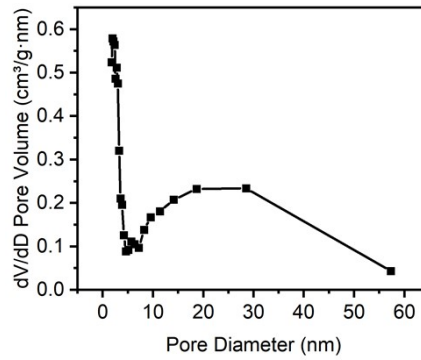

Figure S15 The corresponding pore-size distribution of P/C@Ge.

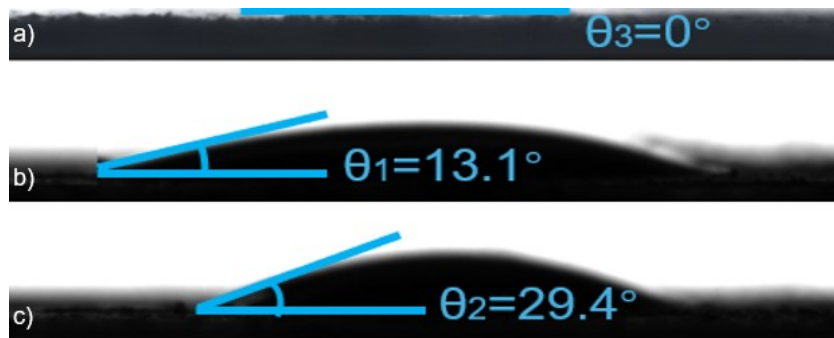

Figure S16 The contact angles measurements of bare Ge (a), LPO/C@Ge (b) and P/C@Ge (c).

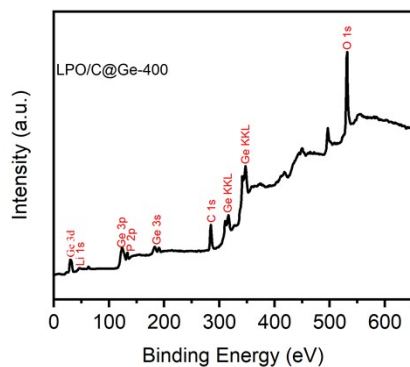

Figure S17 Survey scan XPS spectra of LPO/C@Ge.

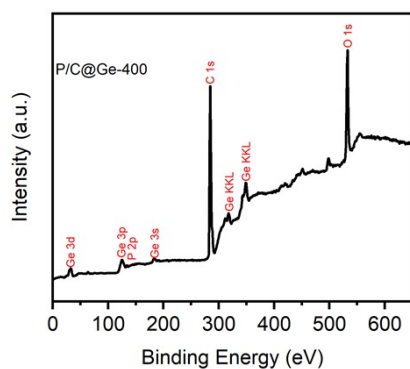

Figure S18 Survey scan XPS spectra of P/C@Ge.

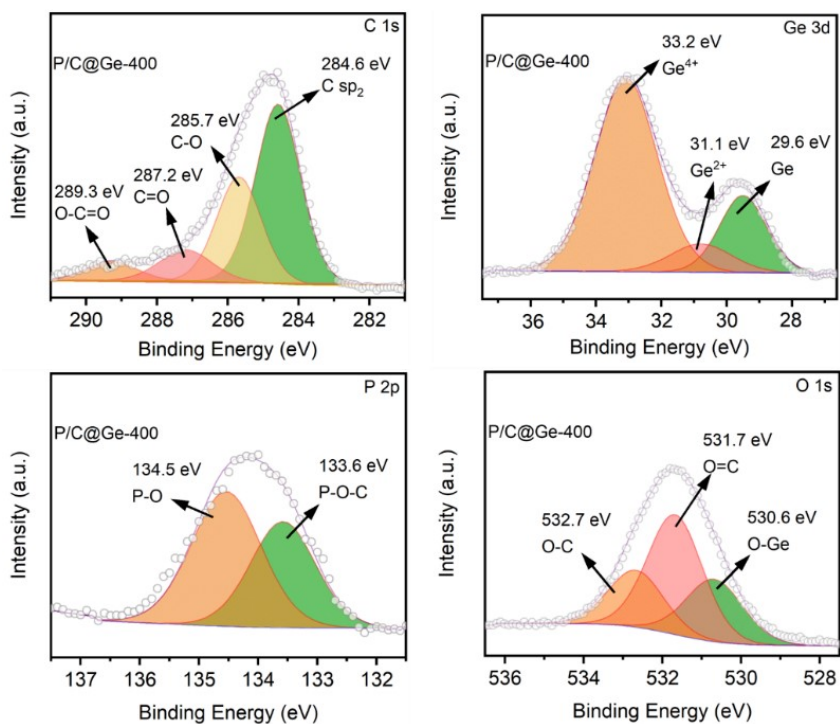

Figure S19 High resolution XPS spectrum of P/C@Ge.



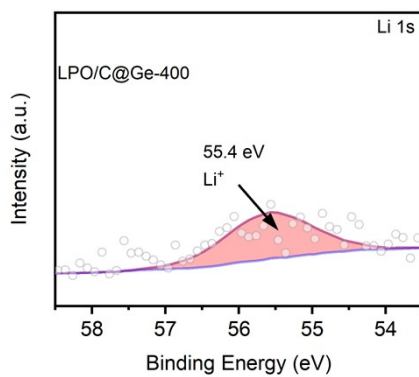

Figure S20 High resolution Li 1s XPS spectrum of LPO/C@Ge.

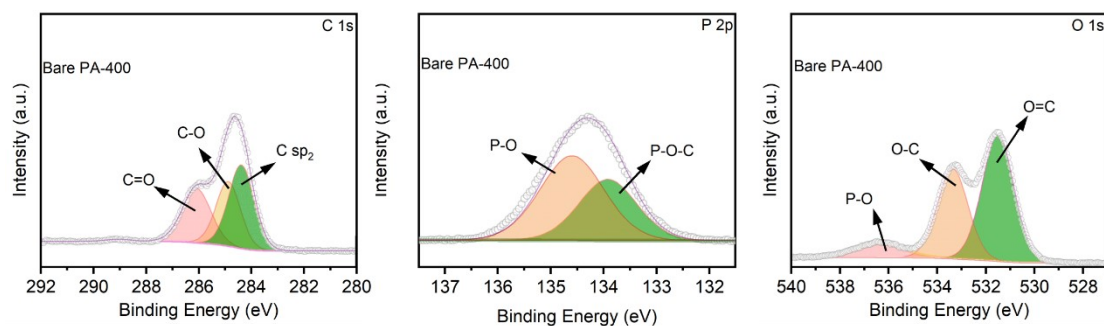

Figure S21 High resolution XPS spectrum of PA-400.

During the sintering process, the  $O_2$  generated from the decomposition of PA reacts with Ge to form Ge-O bonds, preventing P from coordinating and leading to the formation of P-doped carbon. In the bare PA sample, this results in the formation of  $P_2O_5$ . Compared with P/C@Ge-400, PA-400 exhibits weaker binding between C and O, and stronger binding between P and O, indicating that  $P_2O_5$  is the dominant form of phosphorus in PA-400, while P-C is the main form of phosphorus in P/C@Ge-400.



Table S1 Previously reported cycle performance of the Ge anode.

| Samples                                   | Current density       | Initial capacity           | Initial coulombic efficiency | Capacity (after cycling)                        | Ref.      |
|-------------------------------------------|-----------------------|----------------------------|------------------------------|-------------------------------------------------|-----------|
| Ge nanowires                              | 0.3 A g <sup>-1</sup> | 1284.3 mAh g <sup>-1</sup> | 79.6%                        | 1058.9 mAh g <sup>-1</sup> (300 <sup>th</sup> ) | 5         |
| Sp-Ge/C-Pitch                             | 1.0 A g <sup>-1</sup> | 1013.0 mAh g <sup>-1</sup> | 82.7%                        | 645.0 mAh g <sup>-1</sup> (300 <sup>th</sup> )  | 10        |
| Ge@B-PAALi                                | 1.0 A g <sup>-1</sup> | 1254.9 mAh g <sup>-1</sup> | 75.1%                        | 1053.8 mAh g <sup>-1</sup> (500 <sup>th</sup> ) | 12        |
| Ge/Co <sub>3</sub> O <sub>4</sub> nanorod | 1.0 A g <sup>-1</sup> | 1445.0 mAh g <sup>-1</sup> | 24.6%                        | 1171.0 mAh g <sup>-1</sup> (298 <sup>th</sup> ) | 15        |
| Ge/rGO/CNTs                               | 0.5 A g <sup>-1</sup> | 983.4 mAh g <sup>-1</sup>  | 60.5%                        | 614.5 mAh g <sup>-1</sup> (300 <sup>th</sup> )  | 16        |
| Ge@N-CNTs                                 | 0.1 A g <sup>-1</sup> | 1176.0 mAh g <sup>-1</sup> | 68.0%                        | 892.0 mAh g <sup>-1</sup> (200 <sup>th</sup> )  | 21        |
| Ge/CNFs                                   | 1.0 A g <sup>-1</sup> | 1297.0 mAh g <sup>-1</sup> | 49.6%                        | 1050.0 mAh g <sup>-1</sup> (100 <sup>th</sup> ) | 22        |
| LPO/C@Ge                                  | 1.0 A g <sup>-1</sup> | 1255.5 mAh g <sup>-1</sup> | 80.1%                        | 1202.2 mAh g <sup>-1</sup> (600 <sup>th</sup> ) | This work |

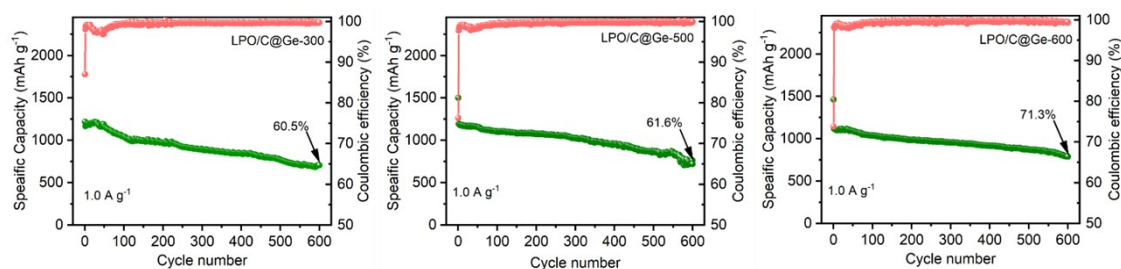

Figure S22 Cycling performance of LPO/C@Ge at a current density of 1.0 A g<sup>-1</sup> under different temperatures (N<sub>2</sub> atmospheres).

Combined with the XRD results, the difference in properties suggests that the temperature and atmosphere during annealing are key factors in the formation of Li<sub>3</sub>PO<sub>4</sub> and GeO<sub>2</sub>.

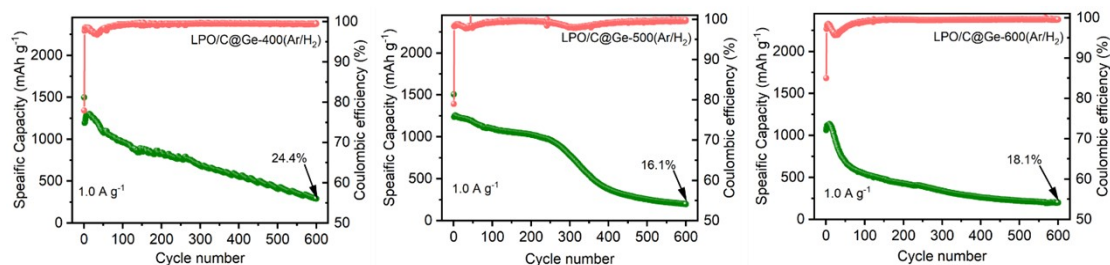

Figure S23 Cycling performance of LPO/C@Ge at a current density of 1.0 A g<sup>-1</sup> under different temperatures (Ar/H<sub>2</sub> atmospheres).

Although the use of a reductive atmosphere during annealing can prevent the formation of

GeO<sub>2</sub>, it impedes the cycling performance.

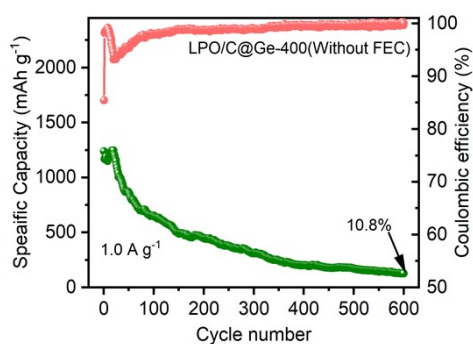

Figure S24 Cycling performance of LPO/C@Ge at a current density of 1.0 A g<sup>-1</sup> under N<sub>2</sub> atmospheres (without FEC).

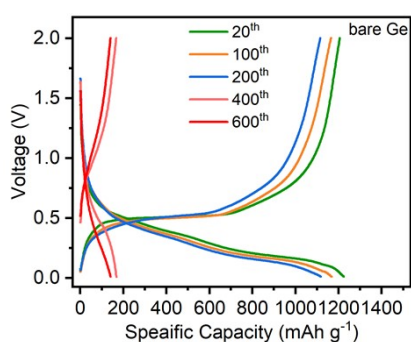

Figure S25 The cyclic voltammograms of bare Ge at the 20<sup>th</sup>, 100<sup>th</sup>, 200<sup>th</sup>, 400<sup>th</sup> and 600<sup>th</sup> cycles at a current density of 1.0 A g<sup>-1</sup>.

Table S2 Previously reported rate performances of Ge anode.

| Samples       | Initial current density | Initial capacity           | High current density  | Capacity retention | Ref. |
|---------------|-------------------------|----------------------------|-----------------------|--------------------|------|
| Ge nanowires  | 0.3 A g <sup>-1</sup>   | 1033.5 mAh g <sup>-1</sup> | 3.0 A g <sup>-1</sup> | 59.5%              | 5    |
| Sp-Ge/C-Pitch | 0.2 A g <sup>-1</sup>   | 1062.3 mAh g <sup>-1</sup> | 5.0 A g <sup>-1</sup> | 65.8%              | 10   |
| Ge@B-PAALi    | 0.5 A g <sup>-1</sup>   | 1214.6 mAh g <sup>-1</sup> | 5.0 A g <sup>-1</sup> | 79.3%              | 12   |

|                                           |                       |                            |                       |       |           |
|-------------------------------------------|-----------------------|----------------------------|-----------------------|-------|-----------|
| Ge/Co <sub>3</sub> O <sub>4</sub> nanorod | 0.5 A g <sup>-1</sup> | 1237.0 mAh g <sup>-1</sup> | 5.0 A g <sup>-1</sup> | 63.6% | 15        |
| Ge/rGO/CNTs                               | 0.1 A g <sup>-1</sup> | 1051.5 mAh g <sup>-1</sup> | 2.0 A g <sup>-1</sup> | 52.3% | 16        |
| Ge@N-CNTs                                 | 0.1 A g <sup>-1</sup> | 1145.0 mAh g <sup>-1</sup> | 3.2 A g <sup>-1</sup> | 74.2% | 21        |
| Ge/CNFs                                   | 0.2 A g <sup>-1</sup> | 1330.0 mAh g <sup>-1</sup> | 5.0 A g <sup>-1</sup> | 55.4% | 22        |
| LPO/C@Ge                                  | 0.5 A g <sup>-1</sup> | 1327.4 mAh g <sup>-1</sup> | 5.0 A g <sup>-1</sup> | 93.1% | This work |

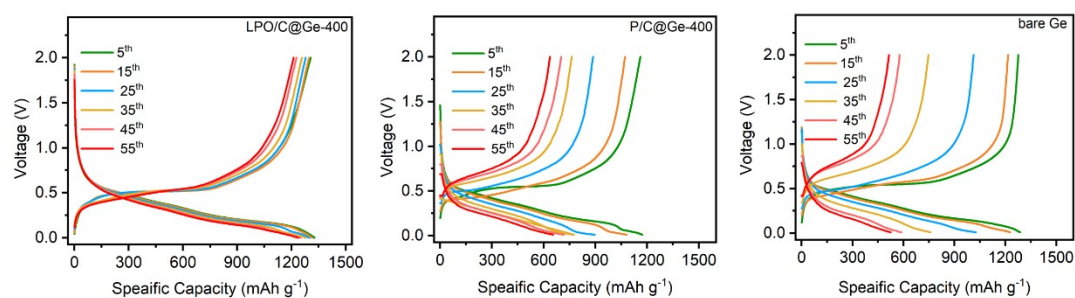

Figure S26 The Cyclic voltammetry curves of LPO/C@Ge, P/C@Ge and bare Ge at different rates (0.5, 1, 2, 3, 4 and 5 A g<sup>-1</sup>).

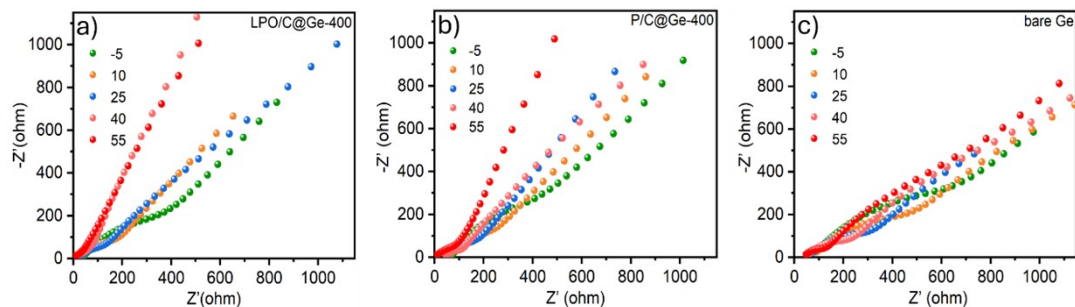

Figure S27 EIS of LPO/C@Ge (a), P/C@Ge (b), and bare Ge (c) at different temperatures.

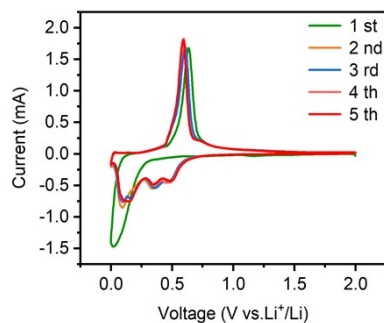

Figure S28 The CV curves of P/C@Ge at scan rate of 0.1 mV s<sup>-1</sup>.

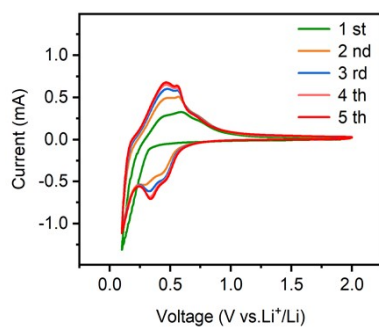

Figure S29 The CV curves of bare Ge at scan rate of  $0.1 \text{ mV s}^{-1}$ .

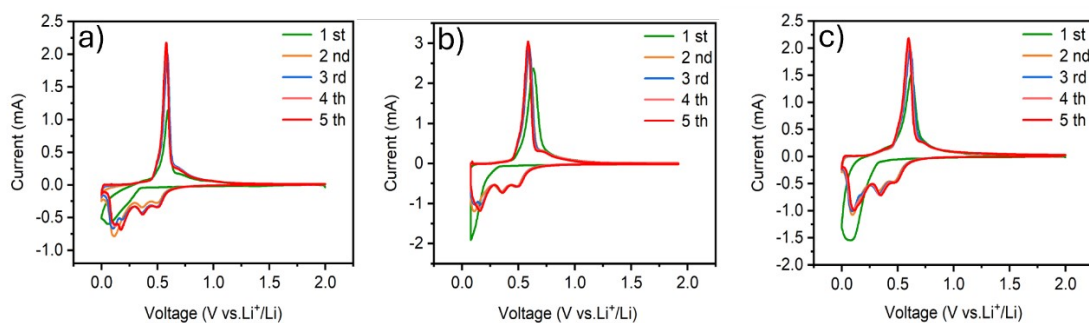

Figure S30 The CV curves of LPO/C@Ge-300 (a), LPO/C@Ge-500 (b) and LPO/C@Ge-600 (c) at scan rate of  $0.1 \text{ mV s}^{-1}$ .

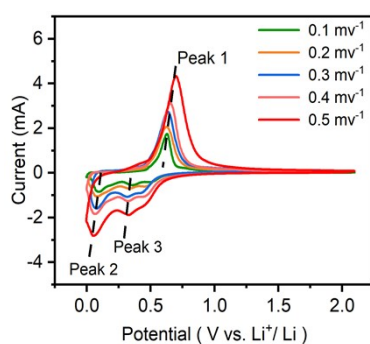

Figure S31 The CV curves of the P/C@Ge at different scan rates.

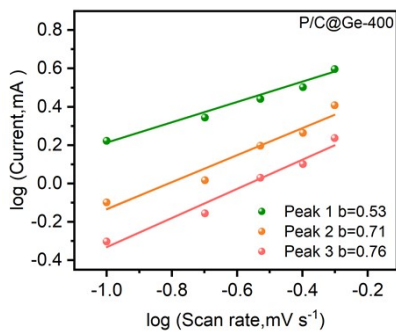

Figure S32 The plots of  $\log(I)$  vs.  $\log(v)$  ( $I$ : peak current;  $v$ : scan rate. The values of  $I$  and  $v$  are derived from Figure S23).

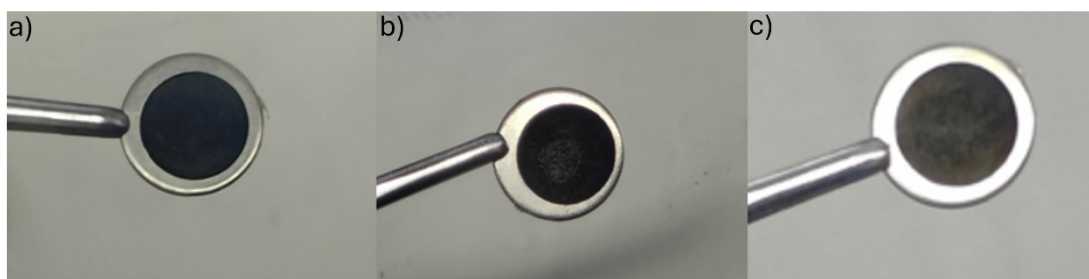

Figure S33 Photographs of LPO/C@Ge, P/C@Ge and bare Ge cathodes after 100 cycles.

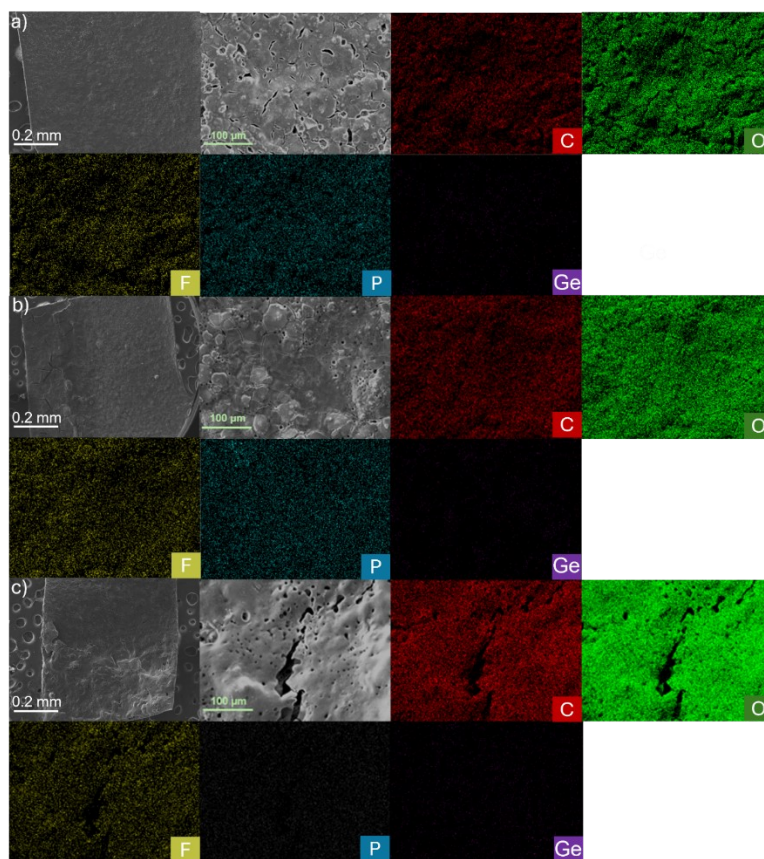

Figure S34 In-situ scanned images and EDS of the LPO/C@Ge, P/C@Ge and bare Ge cathodes after 100 cycles.
